# Supplementary material
Source: publisher figshare collection journal article supplement (https://acs.figshare.com/ndownloader/files/3794479)

# SUPPORTING INFORMATION

## Structural Studies of (*rac*)-BIPHEN Organomagnesiates and Intermediates in the Halogen-metal Exchange of 2-Bromopyridine

Javier Francos, Philippe C. Gros,<sup>\*</sup> Alan R. Kennedy, and Charles T. O'Hara<sup>\*</sup>

### General Methods

All reactions were performed under a protective argon atmosphere using standard Schlenk techniques. Hexane and THF were obtained from Aldrich and freshly distilled from sodium/benzophenone prior to use.  $(\text{CH}_2\text{SiMe}_3)_2\text{Mg}$  and  $(\text{CH}_2\text{CMe}_3)_2\text{Mg}$  were prepared from the Grignard reagent  $(\text{CH}_2\text{SiMe}_3)\text{MgCl}$  and  $(\text{CH}_2\text{CMe}_3)\text{MgCl}$  by manipulation of the Schlenk equilibrium via the dioxane precipitation method. The resultant off-white solid was purified via sublimation at 175 °C ( $10^{-2}$  Torr) to furnish pure  $(\text{CH}_2\text{SiMe}_3)_2\text{Mg}$  and  $(\text{CH}_2\text{CMe}_3)_2\text{Mg}$ . Other chemicals were obtained from Aldrich or Strem Chemicals and were used as supplied.  $^1\text{H}$  and  $^{13}\text{C}$  NMR spectra were recorded on a Bruker DPX 400 MHz spectrometer. All  $^{13}\text{C}$  NMR spectra were proton decoupled. Elemental analyses were attempted using a Perkin-Elmer 2400 elemental analyzer; however, due to the extreme air sensitivity of the compounds satisfactory analyses could not be obtained.

**Synthesis of [(*rac*)-BIPHEN] $_2\text{Li}_4(\text{THF})_4 \cdot (\text{THF})$  (1).** (*rac*)-BIPHEN (0.35 g, 1 mmol) was dissolved in THF (5 mL) and cooled to 0 °C for 15 minutes. At this stage  $^n\text{BuLi}$  (1.4 mL, 2 mmol) was added. After stirring for 1 hour, the solvent was removed *in vacuo* resulting in a pale yellow solid. The resulting solid was recrystallized from 15 mL of hot hexane. To aid the crystallization the resulting colourless solution was placed in the freezer at -35 °C, deposited a crop of colorless crystals (0.24 g, yield 47%).  $^1\text{H}$  NMR (400.13 MHz, 298 K,  $\text{d}_8$ -THF): 1.33 (36H, s,  $\text{C}(\text{CH}_3)_3$ ), 1.61 (12H, s,  $\text{CH}_3$ ), 1.81-1.85 (16H, m,  $\text{OCH}_2\text{CH}_2$ , THF), 2.15 (12H, s,  $\text{CH}_3$ ), 3.65-3.68 (16H, m,  $\text{OCH}_2\text{CH}_2$ , THF), 6.76 (4H, s, Ph).  $^{13}\text{C}\{^1\text{H}\}$  NMR (100.62 MHz, 298 K,  $\text{d}_8$ -THF): 16.61 ( $\text{CH}_3$ ), 19.75 ( $\text{CH}_3$ ), 25.42 ( $\text{OCH}_2\text{CH}_2$ , THF), 30.40 ( $\text{C}(\text{CH}_3)_3$ ), 34.04 ( $\text{C}(\text{CH}_3)_3$ ), 67.27 ( $\text{OCH}_2\text{CH}_2$ , THF), 118.33, 125.59, 131.32, 132.31, 133.75, 161.95 (Ph).  $^7\text{Li}$  NMR (155.50 MHz, 298 K,  $\text{d}_8$ -THF):  $\delta$  -0.27.

**Synthesis of [(*rac*)-BIPHEN] $\text{Li}_2\text{MgBu}_2(\text{THF})_3$  (2).** (*rac*)-BIPHEN (0.35 g, 1 mmol) was dissolved in hexane (10 mL) and cooled to 0 °C for 15 minutes. At this stage  $^n\text{BuLi}$  (1.4 mL, 2 mmol) was added and stirred for 1 hour.  $(^n\text{Bu})_2\text{Mg}$  (1 mL of a 1M solution in heptane, 1 mmol) was added at this point, and the resulting suspension was heated gently, affording a clear solution. Addition of THF (0.24 mL, 3 mmol) and slow cooling to -28 °C resulted in the formation of clear colorless crystals (0.46 g, yield 65%).  $^1\text{H}$  NMR (400.13 MHz, 298 K,  $\text{d}_8$ -THF): -1.73- -1.16 (2H, m,  $\text{MgCH}_2$ ), -0.90 - -0.83 (2H, m,  $\text{MgCH}_2$ ), 0.75-0.80 (6H, m, Bu), 1.11-1.39 (8H, s, Bu), 1.42 (18H, s,  $\text{C}(\text{CH}_3)_3$ ), 1.51 (6H, s,  $\text{CH}_3$ ), 1.77-1.79 (12H, m,  $\text{OCH}_2\text{CH}_2$ , THF), 2.08 (6H, s,  $\text{CH}_3$ ), 3.60-3.63 (12H, m,  $\text{OCH}_2\text{CH}_2$ , THF), 6.80 (4H, s, Ph).  $^{13}\text{C}\{^1\text{H}\}$  NMR (100.62 MHz, 298 K,  $\text{d}_8$ -THF): 9.01 ( $\text{MgCH}_2$ ), 15.10 ( $\text{CH}_3$ ), 18.06 ( $\text{CH}_3$ ), 21.43 ( $\text{CH}_3$ ), 27.27 (2 x  $\text{CH}_2$ ), 32.27 ( $\text{C}(\text{CH}_3)_3$ ), 34.09 ( $\text{OCH}_2\text{CH}_2$ , THF), 36.20 ( $\text{C}(\text{CH}_3)_3$ ), 69.15 ( $\text{OCH}_2\text{CH}_2$ , THF), 122.26, 127.09, 134.34, 134.64, 136.26, 161.97 (Ph).  $^7\text{Li}$  NMR (155.50 MHz, 298 K,  $\text{d}_8$ -THF):  $\delta$  1.41.

**Synthesis of [(*rac*)-BIPHEN] $\text{Li}_2\text{Mg}(\text{CH}_2\text{SiMe}_3)_2(\text{THF})_3$  (3).** (*rac*)-BIPHEN (0.35 g, 1 mmol) was dissolved in hexane (10 mL) and cooled to 0 °C for 15 minutes. At this stage  $^n\text{BuLi}$  (1.4 mL, 2 mmol) was added and stirred for 1 hour.  $(\text{CH}_2\text{SiMe}_3)_2\text{Mg}$  (0.2 g, 1 mmol) was added at this point, and the resulting suspension was heated gently, affording a clear solution. Addition of THF (0.24 mL, 3 mmol) and slow cooling resulted in the formation of clear colorless crystals (0.64 g, yield 82%).  $^1\text{H}$  NMR (400.13 MHz, 298 K, *cyc*- $\text{C}_6\text{D}_{12}$ ): -2.31 (2H, m,  $\text{MgCH}_2\text{Si}(\text{CH}_3)_3$ ), -1.65 (2H, m,  $\text{MgCH}_2\text{Si}(\text{CH}_3)_3$ ), -0.02 (18H, s,  $\text{Si}(\text{CH}_3)_3$ ), 1.45 (18H, s,  $\text{C}(\text{CH}_3)_3$ ), 1.61 (6H, s,  $\text{CH}_3$ ), 1.72-1.76 (12H, m,  $\text{OCH}_2\text{CH}_2$ , THF), 2.14 (6H, s,  $\text{CH}_3$ ), 3.50-3.54 (12H, m,  $\text{OCH}_2\text{CH}_2$ , THF), 6.92 (2H, s, Ph).  $^{13}\text{C}\{^1\text{H}\}$  NMR (100.62 MHz, 298 K, *cyc*- $\text{C}_6\text{D}_{12}$ ): -9.74 ( $\text{SiCH}_2$ ), 3.04 ( $\text{Si}(\text{CH}_3)_3$ ), 16.04 ( $\text{CH}_3$ ), 19.53 ( $\text{CH}_3$ ), 25.16 ( $\text{OCH}_2\text{CH}_2$ , THF), 30.39 ( $\text{C}(\text{CH}_3)_3$ ), 34.39 ( $\text{C}(\text{CH}_3)_3$ ), 67.63 ( $\text{OCH}_2\text{CH}_2$ , THF), 121.42, 126.07, 131.32, 132.29, 135.33, 158.97 (Ph).  $^7\text{Li}$  NMR (155.50 MHz, 298 K, *cyc*- $\text{C}_6\text{D}_{12}$ ):  $\delta$  -0.18.

**Synthesis of [(*rac*)-BIPHEN] $\text{Li}_2\text{Mg}(^{neo}\text{Pe})_2(\text{THF})_2$  (4).** (*rac*)-BIPHEN (0.35 g, 1 mmol) was dissolved in hexane (10 mL) and cooled to 0 °C for 15 minutes. At this stage  $^n\text{BuLi}$  (1.4 mL, 2 mmol) were added and stirred for 1 hour.  $(^{neo}\text{Pe})_2\text{Mg}$  (0.16 g, 1 mmol) was added at this point, and the resulting suspension was heated gently, affording a clear solution. Addition of THF (0.16 mL, 2 mmol) and slow cooling resulted in the formation of clear colorless crystals (0.25 g, yield 36%).  $^1\text{H}$  NMR (400.13 MHz, 298 K, *cyc*- $\text{C}_6\text{D}_{12}$ ): -1.10 (2H, d,  $^3J_{\text{HH}} = 15\text{Hz}$ ,  $\text{MgCH}_2$ ), -0.13 (2H, d,  $^3J_{\text{HH}} = 15\text{Hz}$ ,  $\text{MgCH}_2$ ), 1.03 (18H, s,  $\text{C}(\text{CH}_3)_3$ ), 1.44 (18H, s,  $\text{C}(\text{CH}_3)_3$ ), 1.61 (6H, s,  $\text{CH}_3$ ), 1.73-1.76 (12H,

m, OCH<sub>2</sub>CH<sub>2</sub>, THF), 2.13 (6H, s, CH<sub>3</sub>), 3.50-3.54 (12H, m, OCH<sub>2</sub>CH<sub>2</sub>, THF), 6.91 (4H, s, Ph). <sup>13</sup>C{<sup>1</sup>H} NMR (100.62 MHz, 298 K, cyc-C<sub>6</sub>D<sub>12</sub>): 16.12 (CH<sub>3</sub>), 19.53 (CH<sub>3</sub>), 25.17 (OCH<sub>2</sub>CH<sub>2</sub>, THF), 25.51 (2 x MgCH<sub>2</sub>), 30.14(C(CH<sub>3</sub>)<sub>3</sub>), 32.34 (C(CH<sub>3</sub>)<sub>3</sub>), 34.49 (C(CH<sub>3</sub>)<sub>3</sub>), 67.53 (OCH<sub>2</sub>CH<sub>2</sub>, THF), 121.01, 126.18, 130.97, 132.43, 135.55, 159.34 (Ph). <sup>7</sup>Li NMR (155.50 MHz, 298 K, cyc-C<sub>6</sub>D<sub>12</sub>): δ 0.07.

**Synthesis of [(rac)-BIPHEN]Li<sub>2</sub>Mg(2-pyridine)<sub>2</sub>(THF)<sub>2</sub> (5).** (rac)- BIPHEN (0.35 g, 1 mmol) was dissolved in hexane (10 mL) and cooled to 0 °C for 15 minutes. At this stage <sup>n</sup>BuLi (1.4 mL, 2 mmol) was added and stirred for 1 hour. (<sup>n</sup>Bu)<sub>2</sub>Mg (1 mL of a 1M solution in heptane, 1 mmol) was added at this point. The solution was cooled to -60 °C, and then 2-bromopyridine (0.095 mL, 1 mmol) was added, and the resulting suspension was allowed to reach ambient temperature slowly. Addition of THF (0.16 mL, 2 mmol), gently heating and slow cooling resulted in the formation of clear colorless crystals (0.32 g, yield 47%; 94% based on 2-bromopyridine). An alternative stoichiometric synthesis could be achieved by reacting isolated crystals of [(rac)-BIPHEN]Li<sub>2</sub>Mg(CH<sub>2</sub>SiMe<sub>3</sub>)<sub>2</sub>(THF)<sub>3</sub> (3) (0.78 g, 1 mmol) with 2-bromopyridine (0.19 mL, 2 mmol) at -60 °C. After reaching ambient temperature, THF (0.16 mL, 2 mmol) was added, obtaining a white suspension that transforms into a deep orange solution after vigorous heating. To aid crystallization, the resulting solution was placed in the freezer at -35 °C, and deposited a crop of yellow crystals (0.46 g, yield 66%). <sup>1</sup>H NMR (400.13 MHz, 298 K, d<sub>8</sub>-THF): 1.26 (18H, s, C(CH<sub>3</sub>)<sub>3</sub>), 1.76 (6H, s, CH<sub>3</sub>), 1.79-1.82 (8H, m, OCH<sub>2</sub>CH<sub>2</sub>, THF), 2.16 (6H, s, CH<sub>3</sub>), 3.63-3.67 (8H, m, OCH<sub>2</sub>CH<sub>2</sub>, THF), 6.69-6.73 (2H, m, Ar), 6.79 (2H, s, Ph), 7.06-7.10 (2H, m, Ar), 7.57 (2H, d, <sup>3</sup>J<sub>HH</sub> = 7.6 Hz, Ar), 8.24 (2H, d, <sup>3</sup>J<sub>HH</sub> = 5.2 Hz, Ar). <sup>13</sup>C{<sup>1</sup>H} NMR (100.62 MHz, 298 K, d<sub>8</sub>-THF): 16.02 (CH<sub>3</sub>), 19.24 (CH<sub>3</sub>), 25.00 (OCH<sub>2</sub>CH<sub>2</sub>, THF), 30.33 (C(CH<sub>3</sub>)<sub>3</sub>), 33.88 (C(CH<sub>3</sub>)<sub>3</sub>), 66.86 (OCH<sub>2</sub>CH<sub>2</sub>, THF), 117.06 (Ar), 120.49, 125.52, 128.45 (Ph), 131.79 (Ar), 132.05, 134.50 (Ph), 135.23, 145.99 (Ar), 159.57 (Ph), 214.7 (Ar). <sup>7</sup>Li NMR (155.50 MHz, 298 K, d<sub>8</sub>-THF): δ 0.65.

**Table S1:** Key crystallographic and refinement parameters for compounds 1-5

|                                                       | 1                                                               | 2                                                                | 3                                                                              | 4                                                                | 5                                                                             |
|-------------------------------------------------------|-----------------------------------------------------------------|------------------------------------------------------------------|--------------------------------------------------------------------------------|------------------------------------------------------------------|-------------------------------------------------------------------------------|
| <b>Empirical formula</b>                              | <b>C<sub>68</sub>H<sub>104</sub>Li<sub>4</sub>O<sub>9</sub></b> | <b>C<sub>44</sub>H<sub>74</sub>Li<sub>2</sub>MgO<sub>5</sub></b> | <b>C<sub>44</sub>H<sub>78</sub>Li<sub>2</sub>MgO<sub>5</sub>Si<sub>2</sub></b> | <b>C<sub>42</sub>H<sub>70</sub>Li<sub>2</sub>MgO<sub>4</sub></b> | <b>C<sub>42</sub>H<sub>56</sub>Li<sub>2</sub>MgN<sub>2</sub>O<sub>4</sub></b> |
| <b>M<sub>r</sub></b>                                  | <b>1093.27</b>                                                  | <b>721.22</b>                                                    | <b>781.43</b>                                                                  | <b>677.17</b>                                                    | <b>691.08</b>                                                                 |
| <b>Cryst syst</b>                                     | <b>Monoclinic</b>                                               | <b>Triclinic</b>                                                 | <b>Triclinic</b>                                                               | <b>Monoclinic</b>                                                | <b>Monoclinic</b>                                                             |
| <b>Space group</b>                                    | <b>C 2/c</b>                                                    | <b>P -1</b>                                                      | <b>P -1</b>                                                                    | <b>C 2/ c</b>                                                    | <b>C 2/ c</b>                                                                 |
| <b>a (Å)</b>                                          | <b>15.9337(4)</b>                                               | <b>11.3150(5)</b>                                                | <b>11.1354(3)</b>                                                              | <b>11.7525(4)</b>                                                | <b>16.4177(14)</b>                                                            |
| <b>b (Å)</b>                                          | <b>21.4472(6)</b>                                               | <b>11.6395(5)</b>                                                | <b>12.7861(3)</b>                                                              | <b>17.2189(5)</b>                                                | <b>12.3325(8)</b>                                                             |
| <b>c (Å)</b>                                          | <b>18.7634(4)</b>                                               | <b>18.4418(8)</b>                                                | <b>17.7097(6)</b>                                                              | <b>21.5342(7)</b>                                                | <b>20.0058(15)</b>                                                            |
| <b>α (deg)</b>                                        |                                                                 | <b>88.063(3)</b>                                                 | <b>91.832(2)</b>                                                               |                                                                  |                                                                               |
| <b>β (deg)</b>                                        | <b>91.798(2)</b>                                                | <b>81.313(4)</b>                                                 | <b>98.917(3)</b>                                                               | <b>100.468(3)</b>                                                | <b>103.285(8)</b>                                                             |
| <b>γ (deg)</b>                                        |                                                                 | <b>69.075(4)</b>                                                 | <b>105.629(2)</b>                                                              |                                                                  |                                                                               |
| <b>V (Å<sup>3</sup>)</b>                              | <b>6408.9(3)</b>                                                | <b>2242.06(17)</b>                                               | <b>2391.69(12)</b>                                                             | <b>4285.2(2)</b>                                                 | <b>3942.2(5)</b>                                                              |
| <b>Z</b>                                              | <b>4</b>                                                        | <b>2</b>                                                         | <b>2</b>                                                                       | <b>4</b>                                                         | <b>4</b>                                                                      |
| <b>μ (mm<sup>-1</sup>)</b>                            | <b>0.072</b>                                                    | <b>0.637</b>                                                     | <b>0.126</b>                                                                   | <b>0.077</b>                                                     | <b>0.087</b>                                                                  |
| <b>T (K)</b>                                          | <b>123</b>                                                      | <b>123</b>                                                       | <b>123</b>                                                                     | <b>123</b>                                                       | <b>123</b>                                                                    |
| <b>Reflections collected</b>                          | <b>21498</b>                                                    | <b>22999</b>                                                     | <b>20870</b>                                                                   | <b>13998</b>                                                     | <b>10804</b>                                                                  |
| <b>Reflections unique</b>                             | <b>7361</b>                                                     | <b>8791</b>                                                      | <b>8851</b>                                                                    | <b>4936</b>                                                      | <b>4441</b>                                                                   |
| <b>Reflections observed</b>                           | <b>5316</b>                                                     | <b>6636</b>                                                      | <b>6106</b>                                                                    | <b>3735</b>                                                      | <b>3200</b>                                                                   |
| <b>R<sub>int</sub></b>                                | <b>0.0333</b>                                                   | <b>0.0252</b>                                                    | <b>0.0311</b>                                                                  | <b>0.0288</b>                                                    | <b>0.0385</b>                                                                 |
| <b>No. Parameters</b>                                 | <b>413</b>                                                      | <b>504</b>                                                       | <b>540</b>                                                                     | <b>275</b>                                                       | <b>236</b>                                                                    |
| <b>(GOF)</b>                                          | <b>1.018</b>                                                    | <b>1.054</b>                                                     | <b>1.034</b>                                                                   | <b>1.029</b>                                                     | <b>1.032</b>                                                                  |
| <b>Final R indices</b>                                | <b>R1 = 0.0526</b>                                              | <b>R1 = 0.0640,</b>                                              | <b>R1 = 0.0786</b>                                                             | <b>R1 = 0.0491</b>                                               | <b>R1 = 0.0606</b>                                                            |
| <b>[F<sup>2</sup>-2σ(F)]</b>                          |                                                                 |                                                                  |                                                                                |                                                                  |                                                                               |
| <b>R indices (all data)</b>                           | <b>wR2 = 0.1292</b>                                             | <b>wR2 = 0.1883</b>                                              | <b>wR2 = 0.2336</b>                                                            | <b>wR2 = 0.1228</b>                                              | <b>wR2 = 0.1679</b>                                                           |
| <b>Largest diff. peak and hole (e Å<sup>-3</sup>)</b> | <b>0.294 and -0.218</b>                                         | <b>0.504 and -0.301</b>                                          | <b>1.382 and -0.963</b>                                                        | <b>0.268 and -0.201</b>                                          | <b>0.578 and -0.271</b>                                                       |

Figure S1.  $^1\text{H}$  NMR of  $[(rac)\text{-BIPHEN}]_2\text{Li}_4(\text{THF})_4 \cdot (\text{THF})$  (1) in  $d_8\text{-THF}$

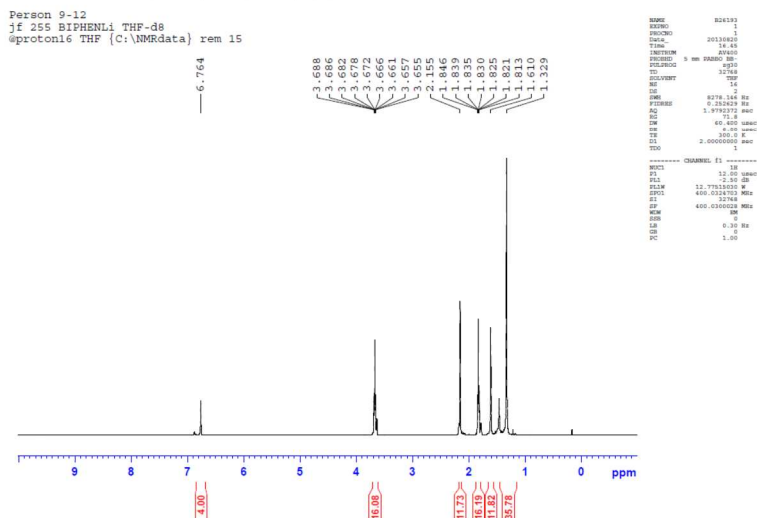

Figure S2.  $^7\text{Li}$  NMR of  $[(rac)\text{-BIPHEN}]_2\text{Li}_4(\text{THF})_4 \cdot (\text{THF})$  (1) in  $d_8\text{-THF}$

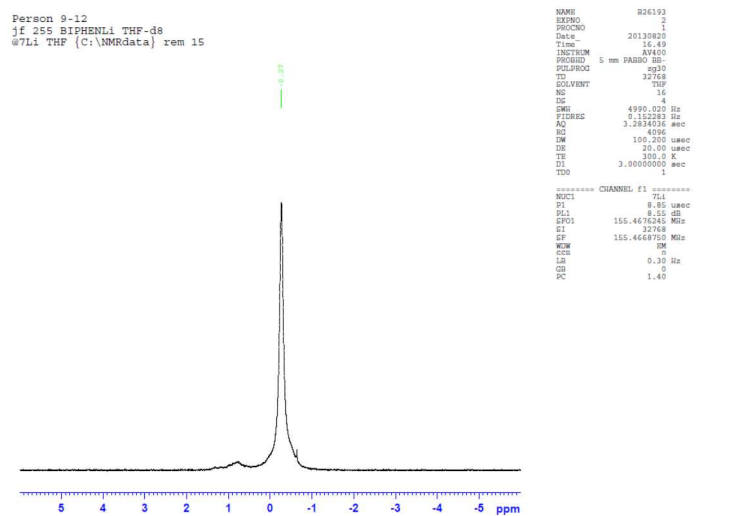

Figure S2b.  $^7\text{Li}$  NMR of  $[(rac)\text{-BIPHEN}]_2\text{Li}_4(\text{THF})_4 \cdot (\text{THF})$  (1) in  $cyc\text{-C}_6\text{D}_{12}$

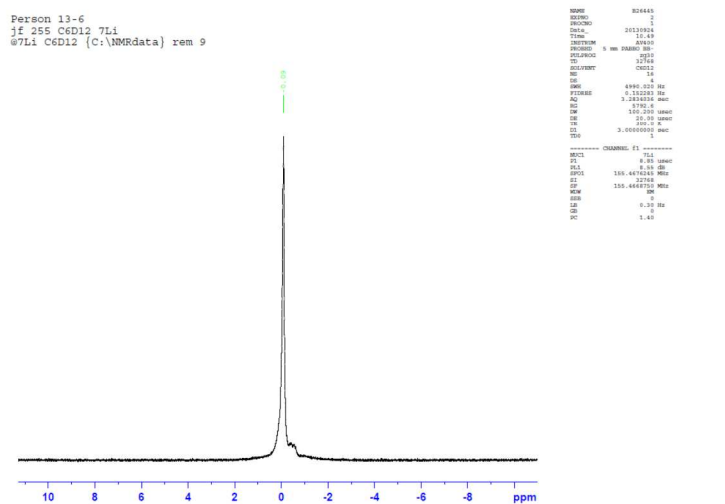

**Figure S3.**  $^{13}\text{C}$  NMR of  $[(rac)\text{-BIPHEN}]_2\text{Li}_4(\text{THF})_4 \cdot (\text{THF})$  (1) in  $\text{d}_8\text{-THF}$

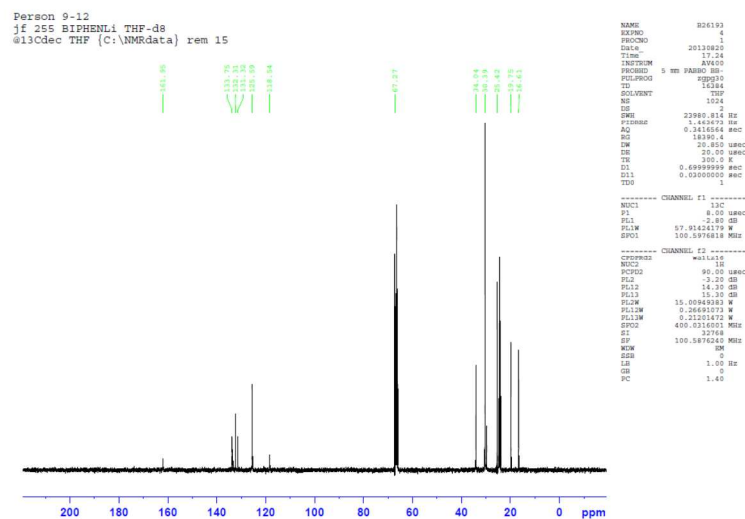

**Figure S4.**  $^1\text{H}$  NMR of  $[(rac)\text{-BIPHENate}]\text{Li}_2\text{Mg}(\text{}^i\text{Bu})_2(\text{THF})_3$  (**2**) in  $\text{d}_8\text{-THF}$ . The resonance at approximately  $-0.5$  ppm is an uncharacterized soluble alkyl-containing impurity that appears to be present in the commercially sourced  $\text{}^i\text{Bu}_2\text{Mg}$ . Note that the commercial reagent contains a significant quantity of  $\text{Et}_3\text{Al}$ .

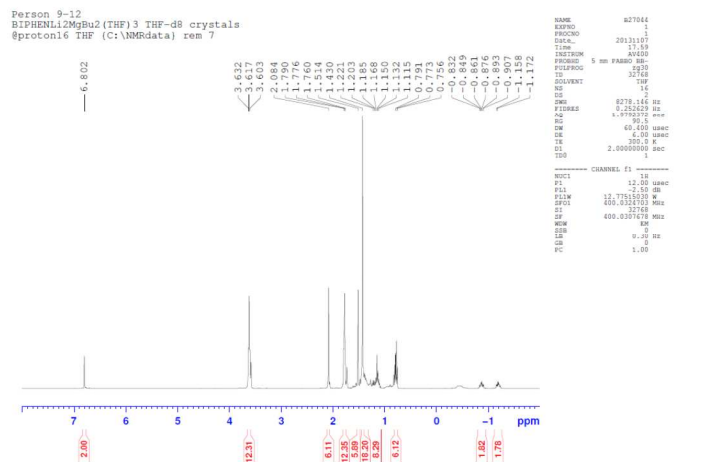

**Figure S5.**  $^7\text{Li}$  NMR of  $[(rac)\text{-BIPHEN}]\text{Li}_2\text{Mg}(\textit{n}\text{Bu})_2(\text{THF})_3$  (**2**) in  $\text{d}_8\text{-THF}$

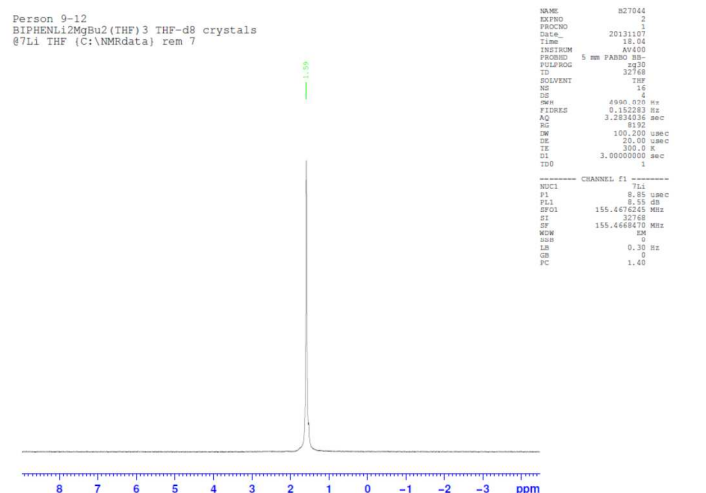

**Figure S6.  $^{13}\text{C}$  NMR of [(*rac*)-BIPHEN]Li<sub>2</sub>Mg(<sup>*n*</sup>Bu)<sub>2</sub>(THF)<sub>3</sub> (2) in d<sub>8</sub>-THF**

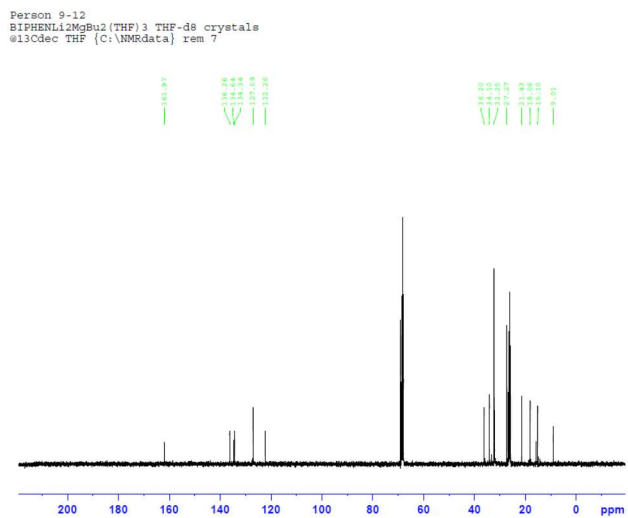

**Figure S7.  $^1\text{H}$  NMR of  $[(rac)\text{-BIPHEN}]_2\text{Li}_2\text{Mg}(\text{THF})_4$  (2b) in *cyc*- $\text{C}_6\text{D}_{12}$**

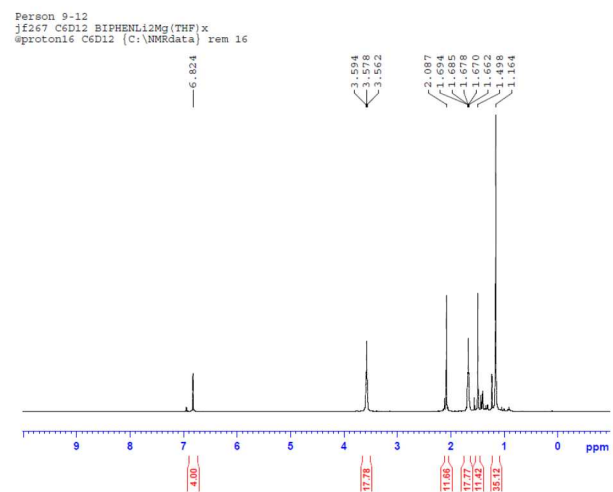

**Figure S8.**  $^1\text{H}$  NMR of  $[(rac)\text{-BIPHEN}]\text{Li}_2\text{Mg}(\text{CH}_2\text{SiMe}_3)_2(\text{THF})_3$  (**3**) in *cyc*- $\text{C}_6\text{D}_{12}$

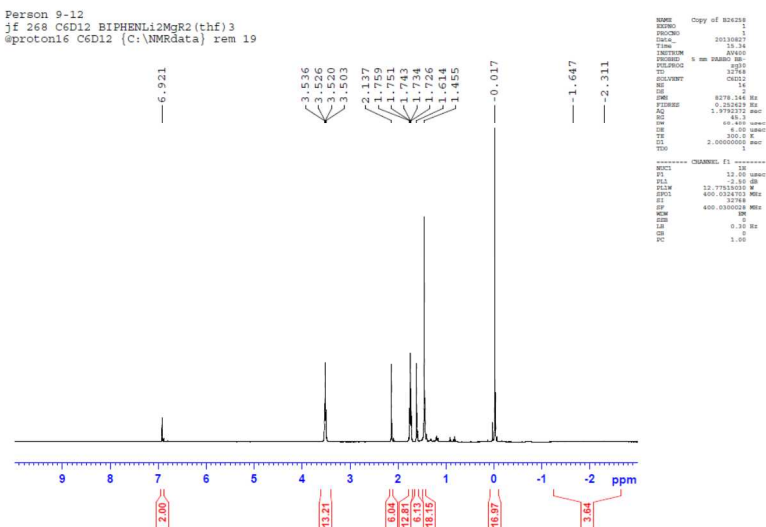

Figure S9.  $^7\text{Li}$  NMR of  $[(rac)\text{-BIPHEN}]\text{Li}_2\text{Mg}(\text{CH}_2\text{SiMe}_3)_2(\text{THF})_3$  (3) in  $\text{cyc-C}_6\text{D}_{12}$

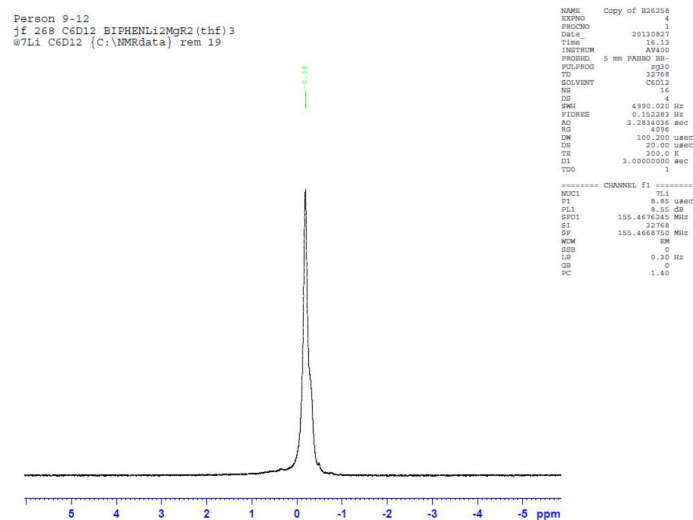

Figure S10.  $^{13}\text{C}$  NMR of  $[(rac)\text{-BIPHEN}]\text{Li}_2\text{Mg}(\text{CH}_2\text{SiMe}_3)_2(\text{THF})_3$  (3) in  $\text{cyc-C}_6\text{D}_{12}$

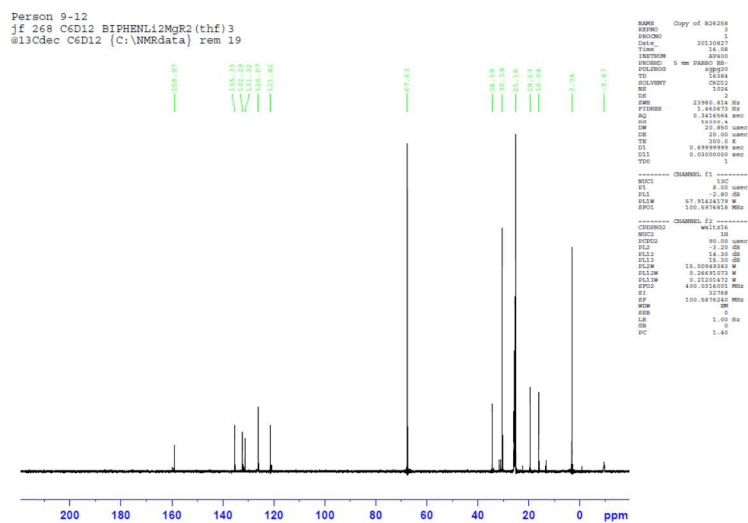

Figure S11.  $^1\text{H}$  NMR of  $[(rac)\text{-BIPHEN}]\text{Li}_2\text{Mg}(\text{neoPe})_2(\text{THF})_2$  (4) in  $\text{cyc-C}_6\text{D}_{12}$

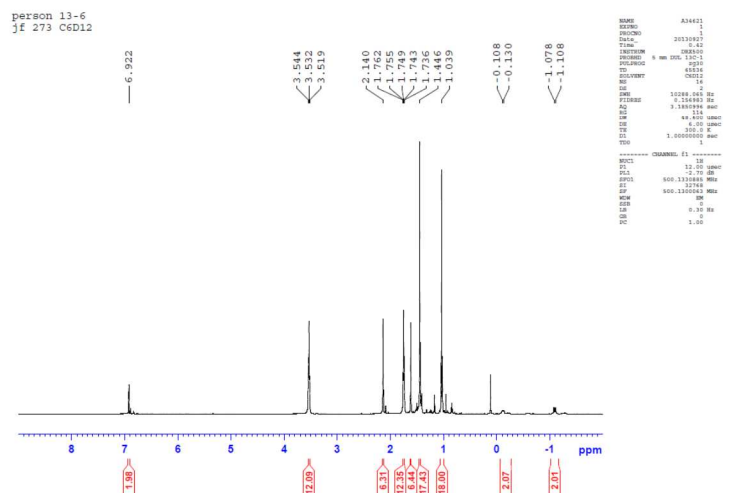

Figure S12.  $^7\text{Li}$  NMR of  $[(rac)\text{-BIPHEN}]\text{Li}_2\text{Mg}(\text{neoPe})_2(\text{THF})_2$  (4) in  $\text{cyc-C}_6\text{D}_{12}$

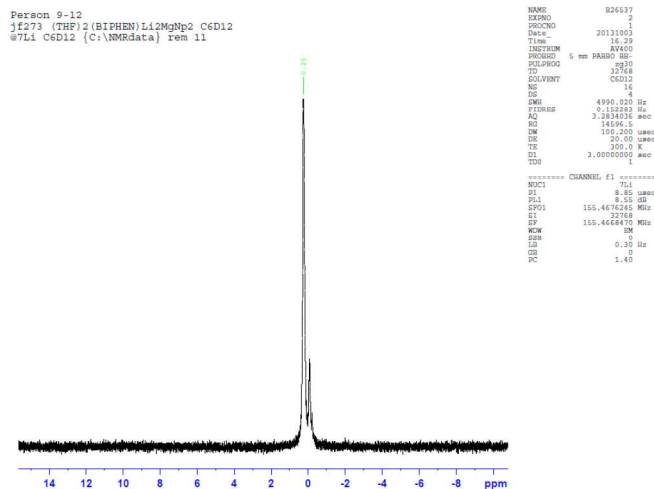

Figure S13.  $^{13}\text{C}$  NMR of  $[(rac)\text{-BIPHEN}]\text{Li}_2\text{Mg}(\text{neo-Pe})_2(\text{THF})_2$  (4) in  $\text{cyc-C}_6\text{D}_{12}$

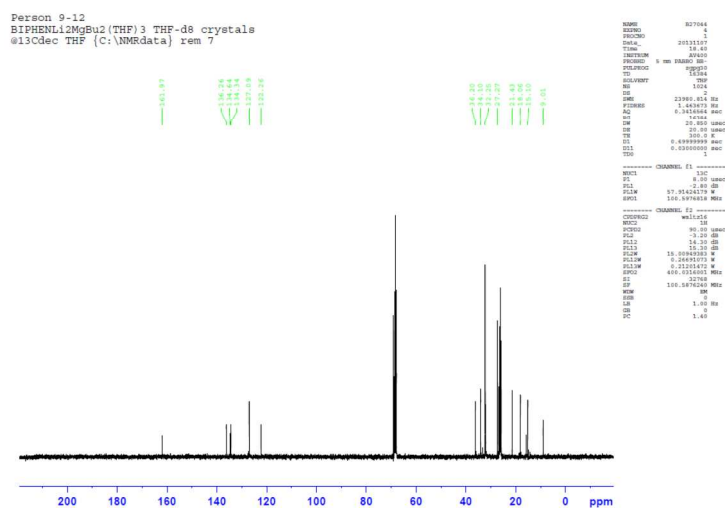

Figure S14.  $^1\text{H}$  NMR of  $[(rac)\text{-BIPHEN}]\text{Li}_2\text{Mg}(2\text{-pyridyl})_2(\text{THF})_2$  (5) in  $\text{d}_8\text{-THF}$

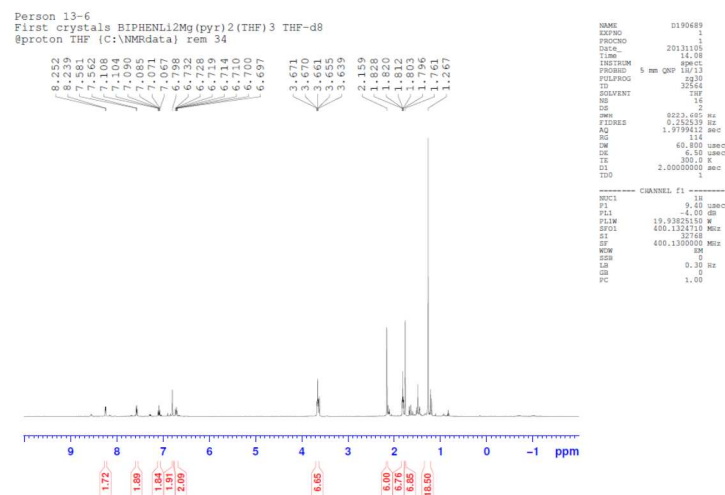

Figure S15.  $^7\text{Li}$  NMR of  $[(rac)\text{-BIPHEN}]\text{Li}_2\text{Mg}(2\text{-pyridyl})_2(\text{THF})_2$  (5) in  $\text{d}_8\text{-THF}$

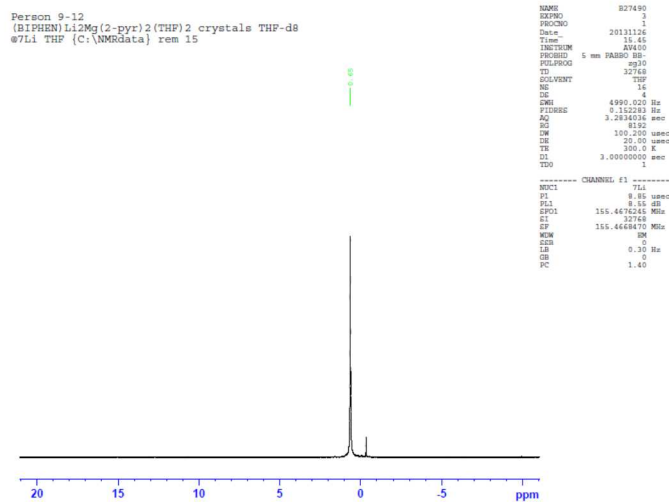

Figure S16.  $^{13}\text{C}$  NMR of  $[(rac)\text{-BIPHEN}]\text{Li}_2\text{Mg}(\text{2-pyridyl})_2(\text{THF})_2$  (5) in  $\text{d}_8\text{-THF}$

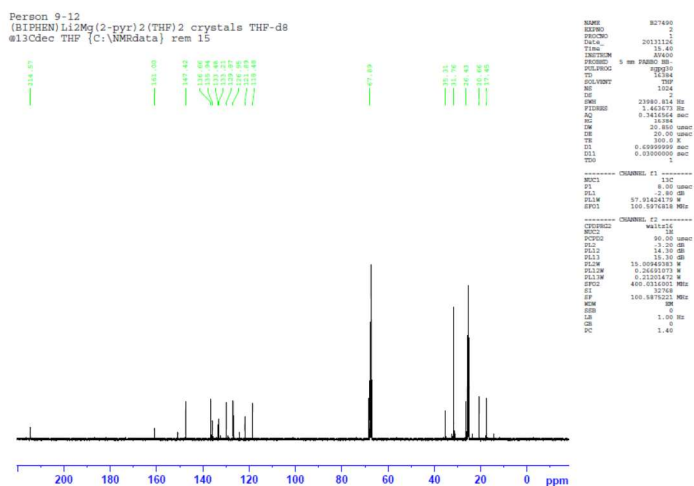

Solution studies of starting materials.



**Figure S17.**  $^1\text{H}$  NMR of a *in situ* mixture (*rac*)-BIPHEN- $\text{H}_2 + 2 \text{ }^n\text{BuLi} + \text{ }^n\text{BuMgCl}$  in  $\text{d}_8\text{-THF}$

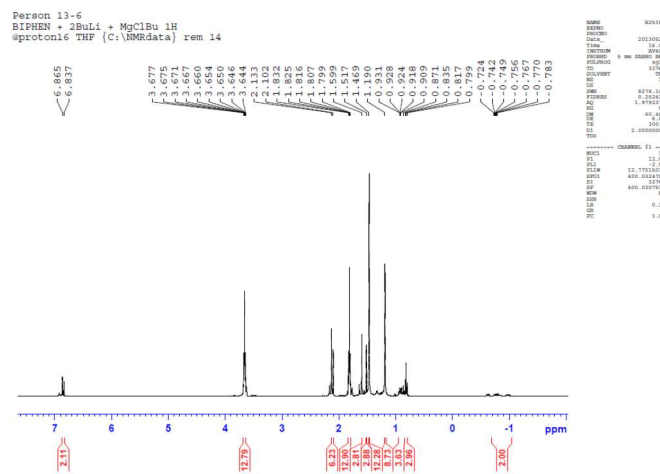

**Figure S18.**  $^7\text{Li}$  NMR of a *in situ* mixture (*rac*)-BIPHEN- $\text{H}_2 + 2 \text{ }^n\text{BuLi} + \text{ }^n\text{BuMgCl}$  in  $\text{d}_8\text{-THF}$

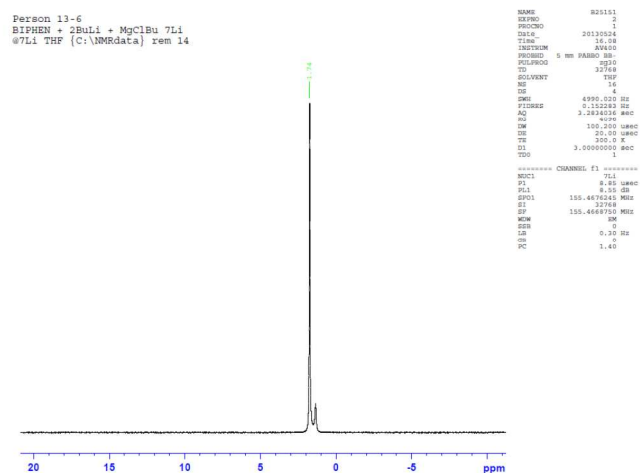

**Figure S19.**  $^1\text{H}$  NMR of a *in situ* mixture (*rac*)-BIPHEN- $\text{H}_2 + 2 \text{ }^n\text{BuLi} + \text{ }^n\text{BuMgCl} + \text{ }^n\text{BuLi}$  in  $\text{d}_8\text{-THF}$

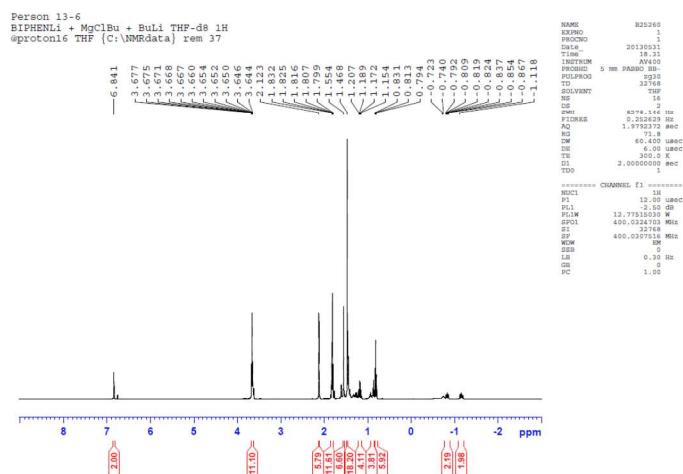

**Figure S20.**  $^7\text{Li}$  NMR of a *in situ* mixture (*rac*)-BIPHEN- $\text{H}_2 + 2$   $^n\text{BuLi} + ^n\text{BuMgCl} + ^n\text{BuLi}$  in  $\text{d}_8$ -THF

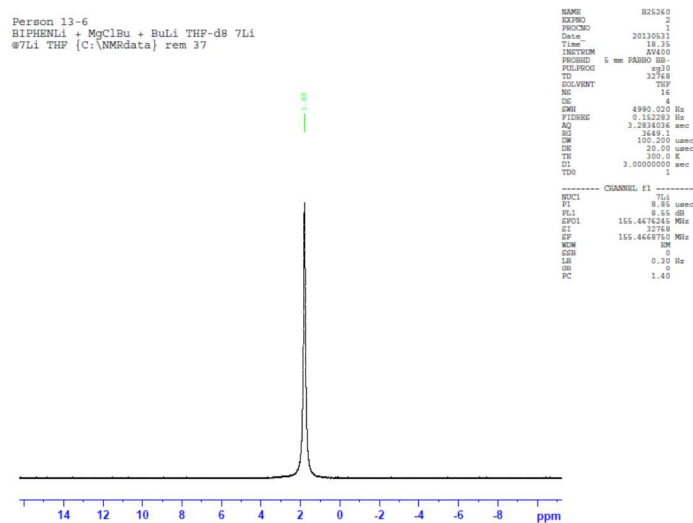

Figure S21.  $^1\text{H}$  NMR of a *in situ* mixture (rac)-BIPHEN- $\text{H}_2 + 2$   $^n\text{BuLi} + (^n\text{Bu})_2\text{Mg}$  in  $\text{d}_8\text{-THF}$

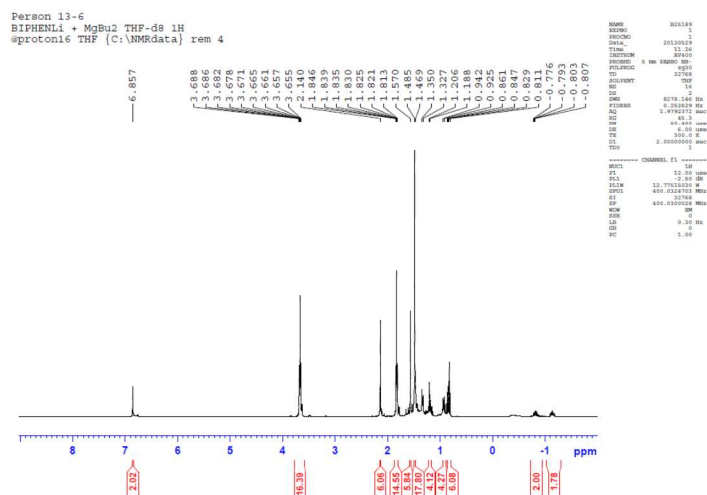

Figure S22.  $^7\text{Li}$  NMR of a *in situ* mixture (rac)-BIPHEN- $\text{H}_2 + 2$   $^n\text{BuLi} + (^n\text{Bu})_2\text{Mg}$  in  $\text{d}_8\text{-THF}$

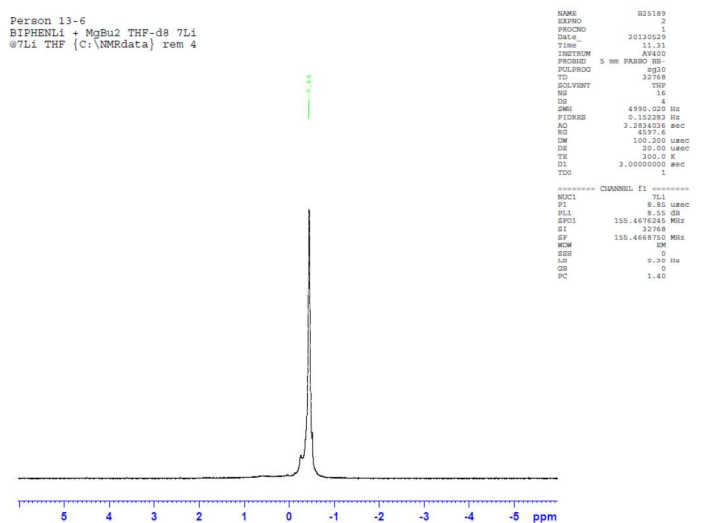

Figure S23.  $^1\text{H}$  NMR comparison of Routes A & B in  $\text{d}_8\text{-THF}$

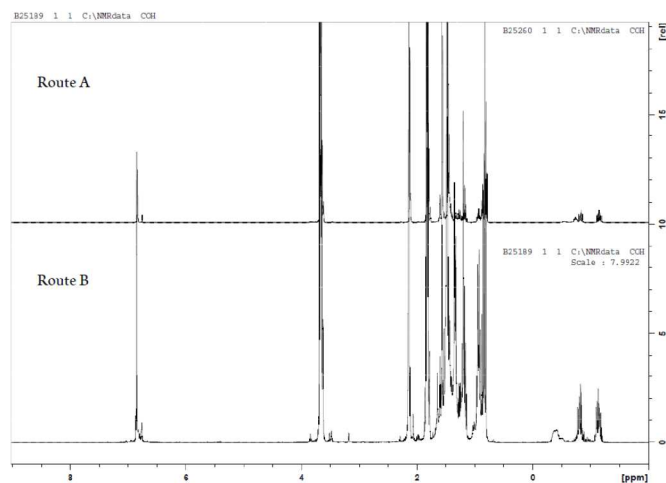

Figure S24.  $^1\text{H}$  NMR of a mixture BIPHEN + 2BuLi + MgBu<sub>2</sub> after reflux.

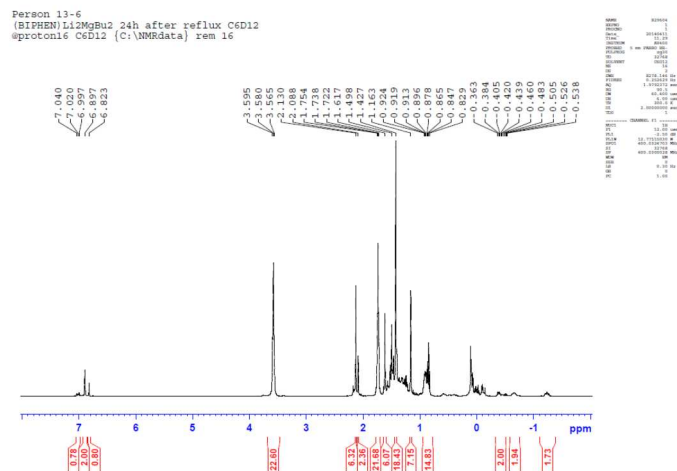

Figure S25.  $^7\text{Li}$  NMR of a mixture BIPHEN + 2BuLi + MgBu<sub>2</sub> after reflux.

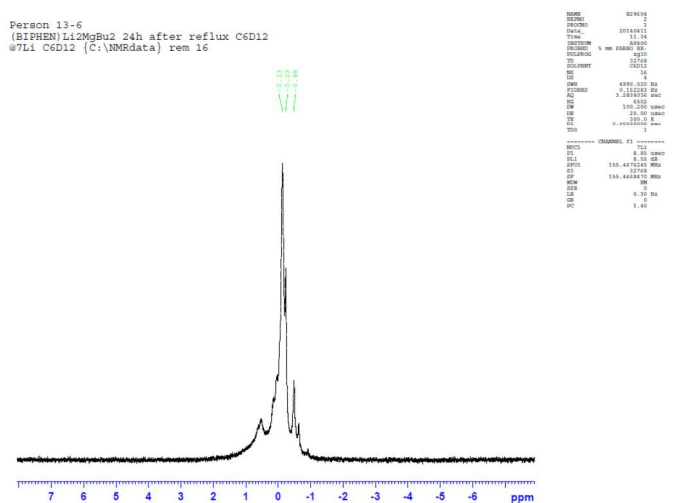

Figure S26.  $^1\text{H}$  NMR of a mixture BIPHEN + 2BuLi + MgBu<sub>2</sub> after reflux. t = 2 days.

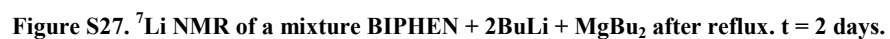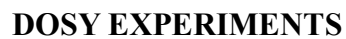

$^1\text{H}$  NMR spectrum of  $[(rac)\text{-BIPHEN}]_2\text{Li}_4(\text{THF})_4 \cdot (\text{THF})$  (1), TPhN, PhN and TMS at 25 °C in  $\text{cyc-C}_6\text{D}_{12}$  (traces of grease are also observed).

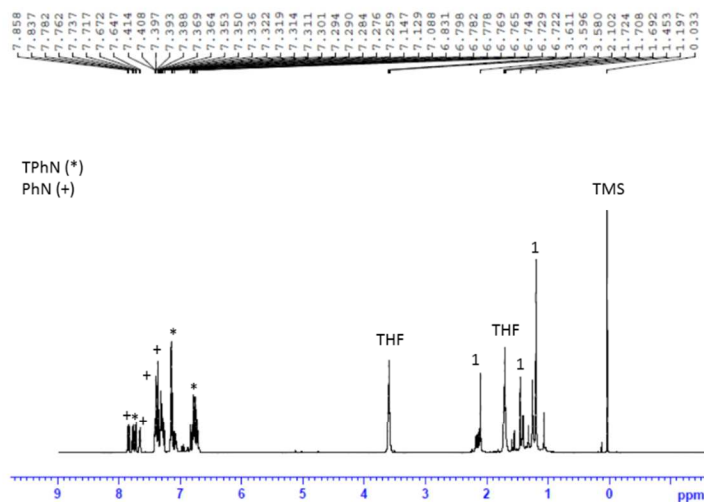

$^1\text{H}$ -DOSY NMR spectrum of 1 and the standards TPhN, PhN and TMS in  $\text{cyc-C}_6\text{D}_{12}$  at 298 K (some traces of grease are also observed).

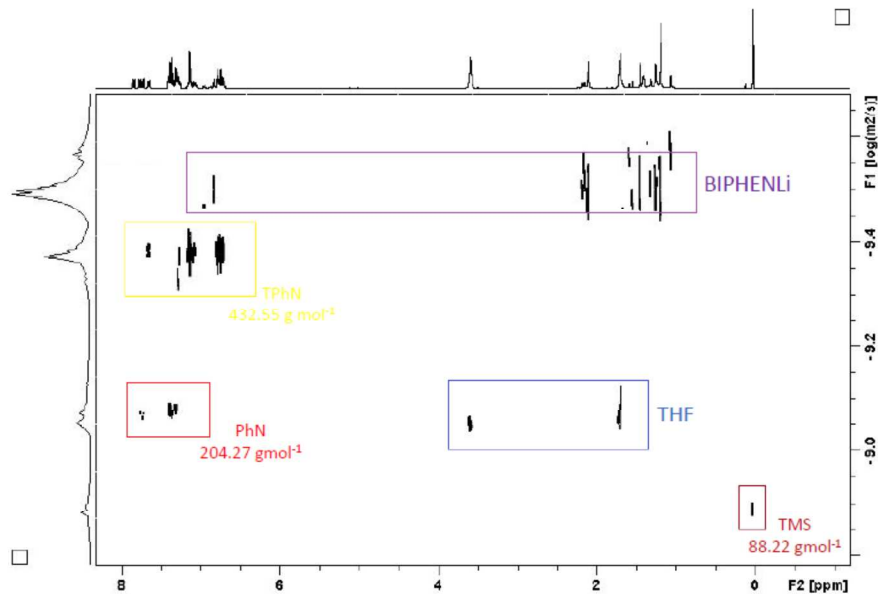

$\log D - \log \text{FW}$  representation from the  $^1\text{H}$ -DOSY data obtained for the mixture of 1, TPhN, PhN and TMS in  $\text{cyc-C}_6\text{D}_{12}$

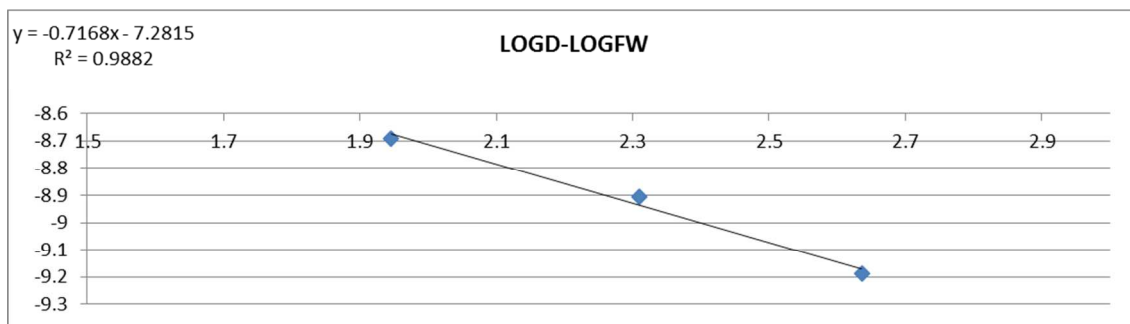

Possible species of [(*rac*)-BIPHEN]<sub>2</sub>Li<sub>4</sub>(THF)<sub>4</sub> · (THF) (1) in *cyc*-C<sub>6</sub>D<sub>12</sub> with errors (in brackets) respect to the FW value predicted through the DOSY study.

FW predicted for [(*rac*)-BIPHEN]<sub>2</sub>Li<sub>4</sub>(THF)<sub>4</sub> · (THF) (1) in *cyc*-C<sub>6</sub>D<sub>12</sub> = 667.4 gmol<sup>-1</sup>

- A [(*rac*)-BIPHEN]<sub>2</sub>Li<sub>4</sub>(THF)<sub>4</sub> C<sub>64</sub>H<sub>96</sub>Li<sub>4</sub>O<sub>8</sub> = 1020.77 gmol<sup>-1</sup> (36%)
- B [(*rac*)-BIPHEN]<sub>2</sub>Li<sub>4</sub> C<sub>48</sub>H<sub>64</sub>Li<sub>4</sub>O<sub>4</sub> = 732.5 gmol<sup>-1</sup> (9%)
- C [(*rac*)-BIPHEN]Li<sub>2</sub> C<sub>24</sub>H<sub>32</sub>Li<sub>2</sub>O<sub>2</sub> = 366.4 gmol<sup>-1</sup> (-82%)
- D [(*rac*)-BIPHEN]Li<sub>2</sub>(THF)<sub>4</sub> = 654.86 gmol<sup>-1</sup> (-1.9%)

<sup>1</sup>H-DOSY NMR spectrum of 2 in *cyc*-C<sub>6</sub>D<sub>12</sub> at 298 K.

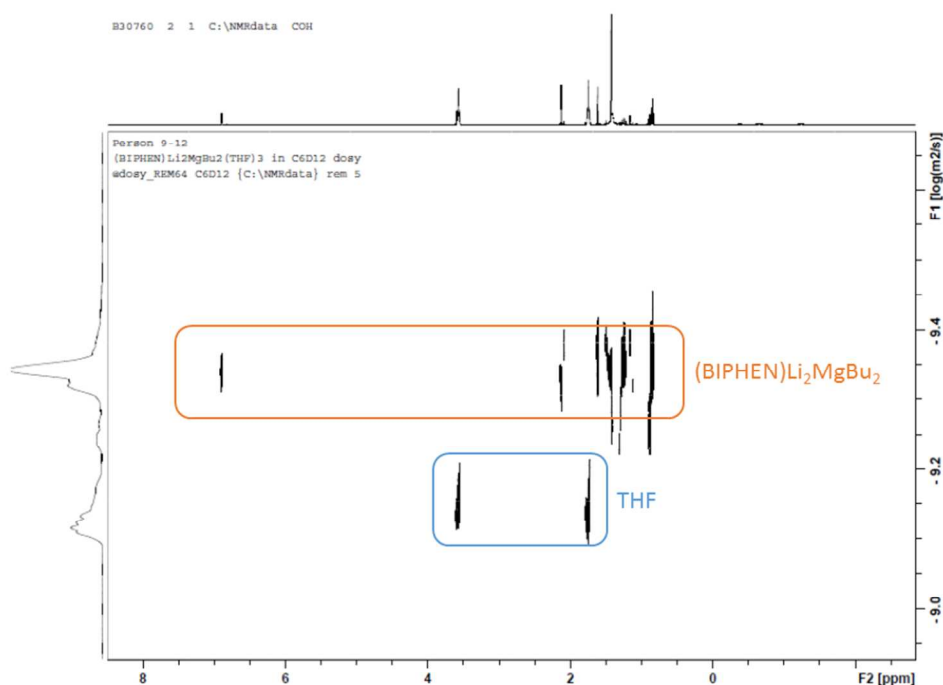

Supplement: Supplementary file 1 [file 3794479]
